# Supplementary material for: Catalytic hydrothermal liquefaction of Euglena sp. microalgae over zeolite catalysts for the production of bio-oil
Source: Royal Society of Chemistry journal article supplement (doi:10.1039/c6ra28747f), 2017-01-01
Supplement: c6ra28747f1.pdf [file c6ra28747f1.pdf]

**Catalytic hydrothermal liquefaction of *Euglena* sp. microalgae over  
zeolite catalysts for the Production of Bio-oil**

Bo Zhang<sup>a,b</sup>, Qisong Lin<sup>a</sup>, Qinhui Zhang<sup>b,c</sup>, Kejing Wu<sup>a</sup>, Weihua Pu<sup>a</sup>, Mingde Yang<sup>a</sup>,

Yulong Wu<sup>a,d\*</sup>

a. Institute of Nuclear and New Energy Technology, Tsinghua University, Beijing 100084,

PR China

b. College of Chemical Engineering, China University of Petroleum, Qingdao 266580,

PR China

c. College of Chemistry and Chemical Engineering, Fujian Normal University, Fuzhou

350117, PR China

d. Beijing Engineering Research Center for Biofuels, Beijing 100084, PR China

\* Corresponding author

Tel:(+86) 10-89796163; Fax: (+86) 10-69771464

E-mail address: wulong@tsinghua.edu.cn

### **Table captions**

Table S1 The GC-MS analysis of the bio-oil obtained from *Euglena* HTL with/without catalysts.

Table S1. The GC-MS analysis of the bio-oil obtained from *Euglena* HTL with/without catalysts.

| No. | Retention time | Organic compounds                  | Relative Content (%) |         |        |        |        |         |
|-----|----------------|------------------------------------|----------------------|---------|--------|--------|--------|---------|
|     |                |                                    | Blank                | HZSM-22 | HZSM-5 | H beta | MCM-22 | SAPO-11 |
| 1   | 2.72           | Pyridine                           | 0.93                 | 1.30    | 1.64   | 1.65   | --     | --      |
| 2   | 3.22           | Cyclopentanone                     | 1.33                 | 1.36    | 1.28   | 1.75   | 1.77   | 0.92    |
| 3   | 3.67           | Pyrazine, methyl-                  | 1.62                 | 2.18    | 1.74   | 1.20   | 2.97   | 1.13    |
| 4   | 3.96           | Cyclopentanone, 2-methyl-          | --                   | 1.05    | --     | --     | --     | --      |
| 5   | 4.37           | Pyridine, 3-methyl-                | --                   | 1.32    | --     | --     | --     | --      |
| 6   | 4.91           | Styrene                            | --                   | 0.95    | --     | --     | --     | --      |
| 7   | 5.22           | 2-Cyclopenten-1-one, 2-methyl-     | 6.85                 | 8.69    | 7.01   | 6.61   | 10.51  | 6.55    |
| 8   | 5.30           | Pyrazine, 2,5-dimethyl-            | 3.14                 | 3.09    | 2.94   | 2.79   | 3.56   | 2.88    |
| 9   | 6.59           | 2-Cyclopenten-1-one, 3-methyl-     | 3.13                 | 3.73    | 3.47   | 2.96   | --     | 1.78    |
| 10  | 7.06           | Phenol                             | 1.93                 | 2.65    | 2.70   | --     | --     | --      |
| 11  | 7.30           | 2-Cyclopenten-1-one, 3,4-dimethyl- | --                   | 2.61    | --     | --     | --     | --      |
| 12  | 7.43           | 2-Cyclopenten-1-one, 2,3-dimethyl- | 3.96                 | 1.35    | 4.56   | 4.16   | 2.33   | 1.60    |
| 13  | 9.40           | 2-Pyrrolidinone                    | 0.85                 | 1.34    | --     | --     | --     | --      |
| 14  | 9.61           | Phenol, 4-methyl-                  | 1.62                 | 1.68    | --     | --     | --     | --      |
| 15  | 10.16          | 1H-Pyrrole, 3-ethyl-2,4-dimethyl-  | 0.78                 | --      | --     | 0.79   | 1.97   | --      |
| 16  | 11.04          | 1H-Pyrrole, 2,3,4,5-tetramethyl-   | 0.75                 | --      | 1.76   | 1.37   | --     | 1.17    |
| 17  | 12.41          | 1H-Pyrrole, 3,4-diethyl-2-methyl-  | 1.31                 | --      | --     | --     | --     | --      |
| 18  | 12.84          | 1H-Pyrrole, 2-ethyl-3,4,5-trimet   | 2.03                 | --      | 3.03   | --     | --     | 2.50    |
| 19  | 15.66          | Indole                             | 1.25                 | --      | --     | --     | --     | --      |

|    |       |                                     |       |       |       |       |       |       |
|----|-------|-------------------------------------|-------|-------|-------|-------|-------|-------|
| 20 | 18.09 | 1H-Indole, 6-methyl-                | 1.20  | --    | --    | --    | --    | --    |
| 21 | 20.21 | 1-Dodecanol                         | 3.25  | 3.28  | 2.74  | 3.18  | 4.10  | 2.85  |
| 22 | 20.64 | 1-Tridecene                         | 1.85  | 6.50  | 6.28  | --    | 2.49  | 1.62  |
| 23 | 22.63 | 1-Tetradecanol                      | --    | --    | --    | 7.53  | --    | --    |
| 24 | 24.66 | Tridecanoic acid                    | 1.22  | --    | --    | --    | --    | --    |
| 25 | 24.73 | 2(1H)-Pyridinone, 1-(2-methylphe    | 1.47  | 2.06  | --    | 2.51  | 3.45  | 2.24  |
| 26 | 24.73 | 2,3-Dimethyl-1H-imidazo(1,2-a)py... | --    | --    | 2.93  | --    | --    | --    |
| 27 | 24.94 | 1-Tetradecene                       | 24.40 | 30.54 | 25.81 | 43.43 | 28.54 | 28.40 |
| 28 | 26.34 | 1,7-Trimethylene-2,3,5-trimethyl... | --    | --    | 1.72  | --    | --    | --    |
| 29 | 26.92 | Tetradecanoic acid                  | 11.65 | 7.81  | 9.56  | 9.50  | 10.81 | 8.28  |
| 30 | 27.20 | n-Pentadecanol                      | 4.36  | 4.97  | 4.38  | --    | 6.57  | 5.07  |
| 31 | 28.31 | 2-Hydroxy-3,5,5-trimethyl-cycloh... | --    | --    | --    | --    | --    | 2.65  |
| 32 | 28.91 | 2-Hexadecene, 3,7,11,15-tetramet... | --    | --    | --    | --    | --    | 7.00  |
| 33 | 30.75 | L-Proline, N-(3-cyclopentylpropi    | 3.38  | --    | --    | --    | --    | --    |
| 34 | 30.77 | 5,10-Diethoxy-2,3,7,8-tetrahydro... | --    | --    | --    | 4.20  | --    | 4.39  |
| 35 | 30.89 | N-[3-[.alpha.-Furylmethylamino]p... | --    | --    | 2.64  | --    | --    | --    |
| 36 | 31.17 | Hexadecanoic acid                   | 3.56  | 2.19  | 3.01  | --    | 2.84  | 3.35  |
| 37 | 31.31 | Tetradecanamide                     | 1.72  | 2.59  | 1.73  | 2.01  | 3.64  | 2.23  |
| 38 | 34.02 | Hexadecanamide                      | 2.31  | 2.24  | 1.97  | --    | 3.35  | 1.96  |
| 39 | 34.20 | Benzeneacetic acid, .alpha.-cyan... | --    | --    | --    | --    | 2.23  | 1.43  |
| 40 | 34.58 | 2,5-Piperazinedione, 3-benzyl-6-    | 1.35  | 1.95  | 1.12  | --    | 3.21  | 3.84  |
| 41 | 35.70 | Pyrrolo[1,2-a]pyrazine-1,4-dione    | 1.72  | 2.58  | 2.52  | 2.02  | 3.71  | 2.38  |

|    |       |                                     |      |    |      |      |      |      |
|----|-------|-------------------------------------|------|----|------|------|------|------|
| 42 | 35.84 | Cyclo-(1-leucyl-1-phenylalanyl)     | --   | -- | --   | --   | --   | 0.75 |
| 43 | 36.17 | Benzyl nitrile                      | 2.87 | -- | 1.15 | --   | 1.95 | 2.18 |
| 44 | 37.50 | 1,2-Benzenedicarboxylic acid, mo... | --   | -- | --   | --   | --   | 0.84 |
| 45 | 39.13 | Pyridine-3-carboxamide, oxime, N    | 0.93 | -- | --   | --   | --   | --   |
| 46 | 39.26 | 13-Docosenamide, (Z)-               | 1.25 | -- | 2.29 | 2.33 | --   | --   |

---
